# Supplementary material for: Integration Mapping of piggyBac-Mediated CD19 Chimeric Antigen Receptor T Cells Analyzed by Novel Tagmentation-Assisted PCR
Source: PubMed Central journal article supplement — eBioMedicine. 2018 Aug 3;34:18–26. doi: 10.1016/j.ebiom.2018.07.008 (PMC6116345; doi:10.1016/j.ebiom.2018.07.008), 2018-08-03
Supplement: mmc1.pdf [file mmc1.pdf]

## **Supplemental Materials**

### **Supplementary Figures pp. 2-4**

Supplementary Figure 1. Plasmids used to generate CD19 CAR-T cells

Supplementary Figure 2. Comparison of integration profiles among three donors

Supplementary Figure 3. Local sequences near vector integration sites

### **Supplementary Tables pp. 5-8**

Supplementary Table 1. List of sequences of primers

Supplementary Table 2. Pairing of primers for 1st PCR

Supplementary Table 3. List of integration sites (a separate Excel file)

Supplementary Table 4. List of oncogenes with integrations into or within 50kb from TSSs

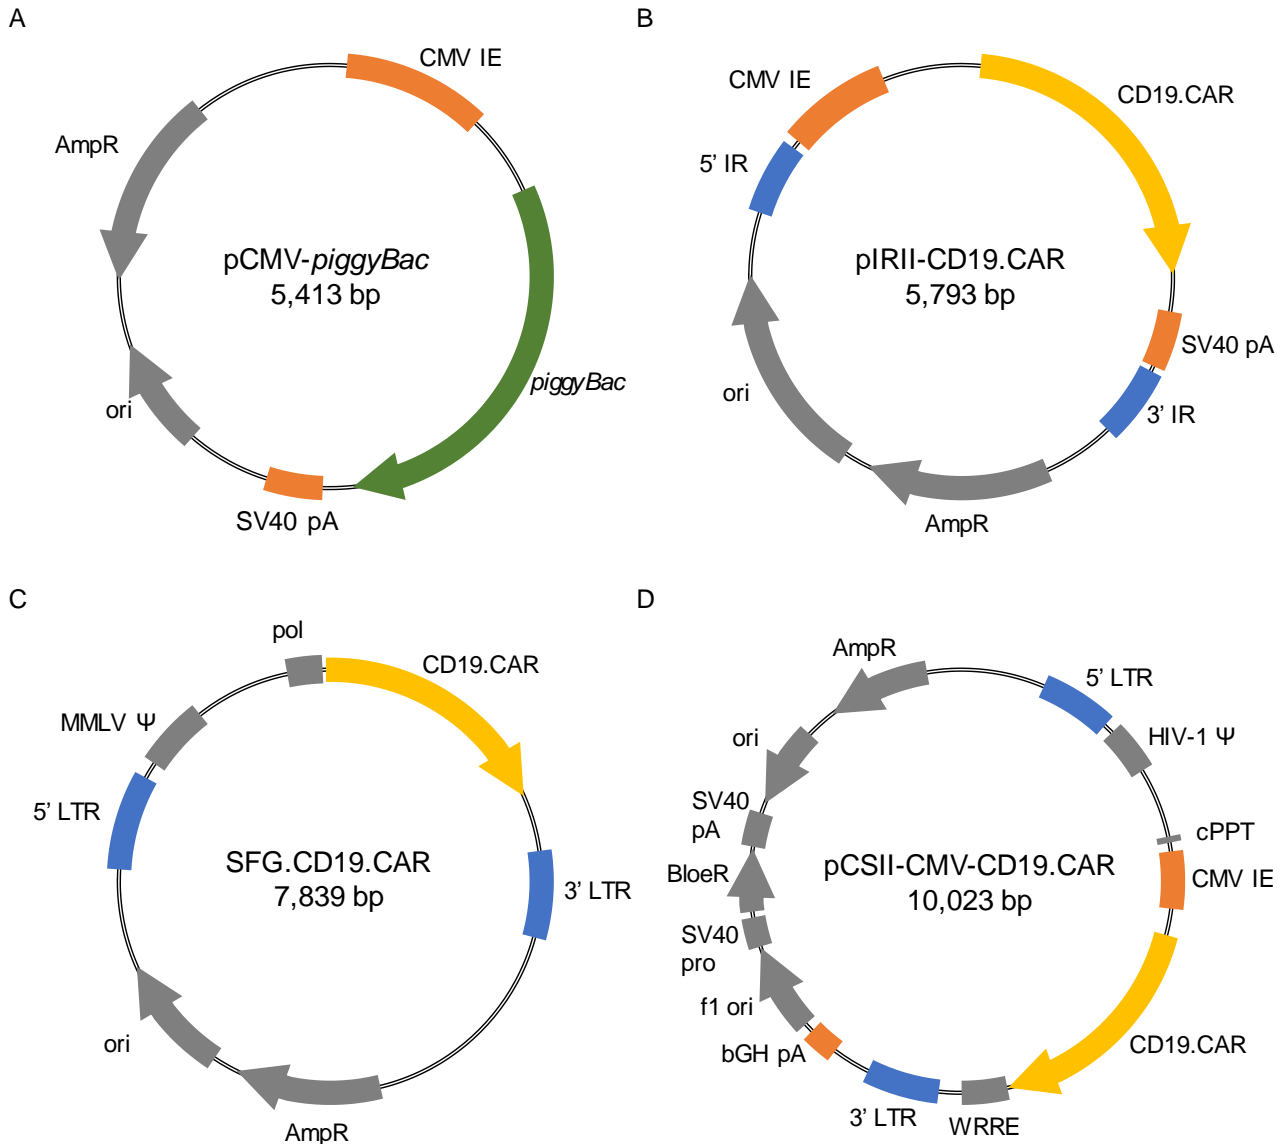

**Supplementary Fig. 1. Plasmids used to generate CD19 CAR-T cells**

Vector illustration of *PiggyBac* transposase plasmid (A), *piggyBac* transposon plasmid (B), retrovirus vector plasmid (C), and lentivirus vector plasmid (D). Genes of interest are shown in yellow (CD19.CAR) and green (*piggyBac* transposase). Specific sequences necessary for insertion of transgene are shown in blue. Promoters and enhancers for transgenes are shown in orange. Other components are shown in gray. AmpR, ampicillin resistance gene; bGH pA, bovine growth hormone polyadenylation signal; BleoR, bleomycin resistance gene; CD19.CAR, CD19-specific chimeric antigen receptor; CMV IE, cytomegalovirus immediate early promoter; cPPT, central polypurine tract; f1 ori, f1 bacteriophage origin of replication; HIV-1 Ψ, Human immunodeficiency virus type-1 packaging signal; IR, inverted terminal repeat; LTR, long terminal repeat; MMLV Ψ, Moloney murine leukemia virus packaging signal; ori, high-copy-number ColE1/pMB1/pBR322/pUC origin of replication; *piggyBac*, *piggyBac* transposase; pol, Moloney murine leukemia virus pol region containing the splice acceptor site; SV40 pA, simian virus 40 polyadenylation signal; SV40 pro, SV40 early promoter; WPRE, woodchuck hepatitis virus posttranscriptional regulatory element.

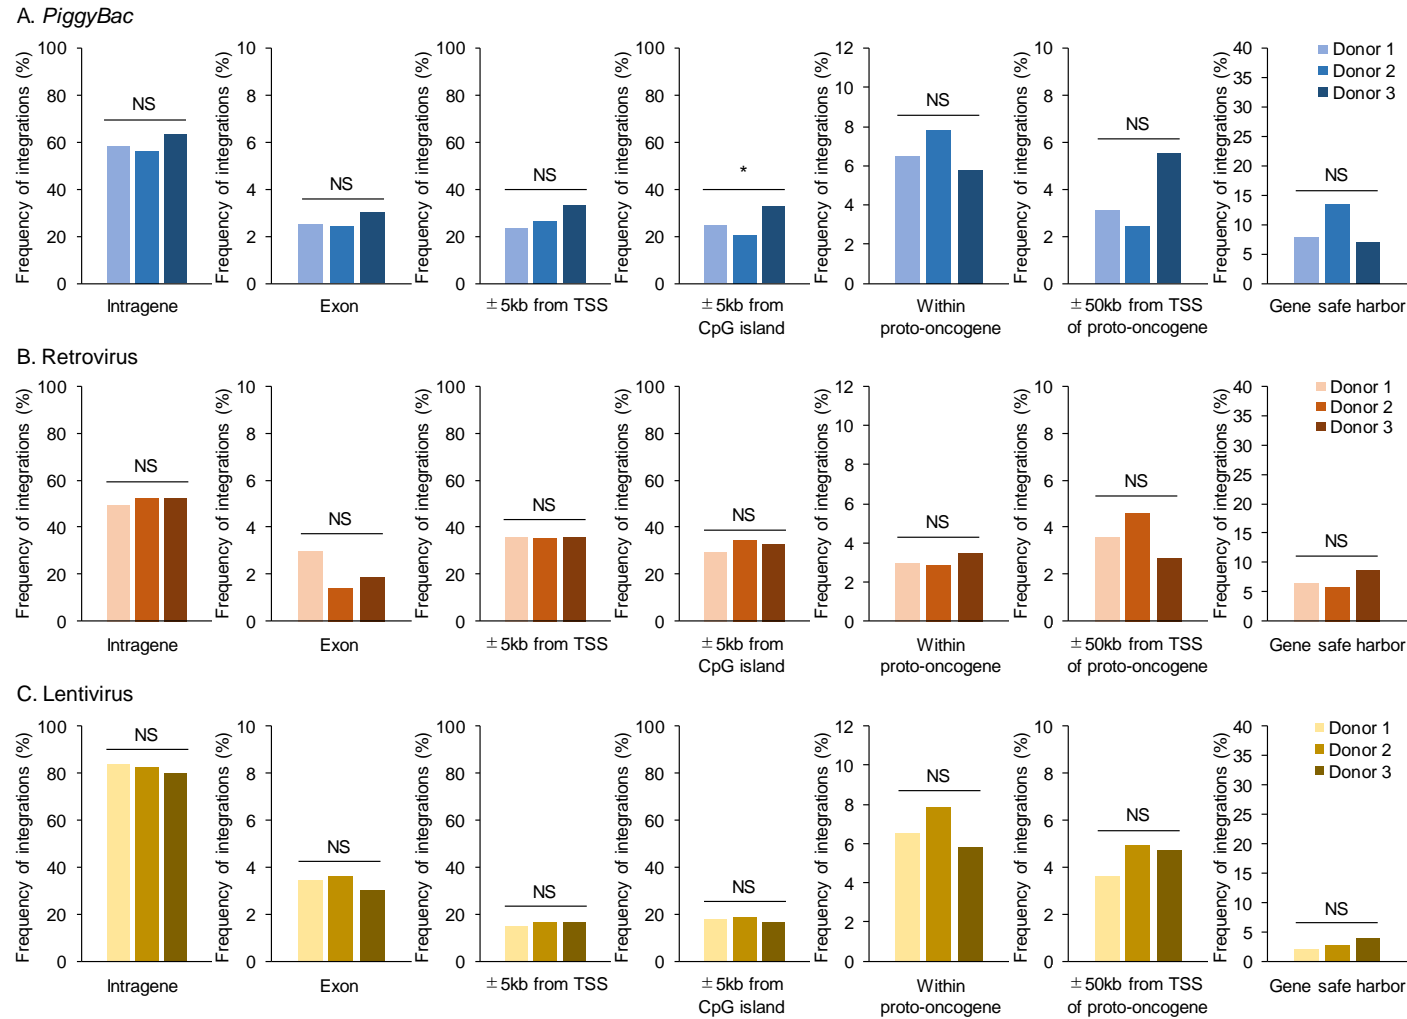

**Supplementary Fig. 2. Comparison of integration profiles among three donors**

Frequency of integration within or around genetic components of CD19 CAR-T cells generated by *piggyBac* transposon (A), retrovirus (B), and lentivirus (C), separately analyzed for each individual donor. Genetic components include genes, exons, 5kb windows around transcriptional start sites (TSSs), 5kb windows around CpG islands, proto-oncogenes, 50kb windows around TSSs of proto-oncogenes, and gene safe harbors. \* P < 0.05; NS, not significant.

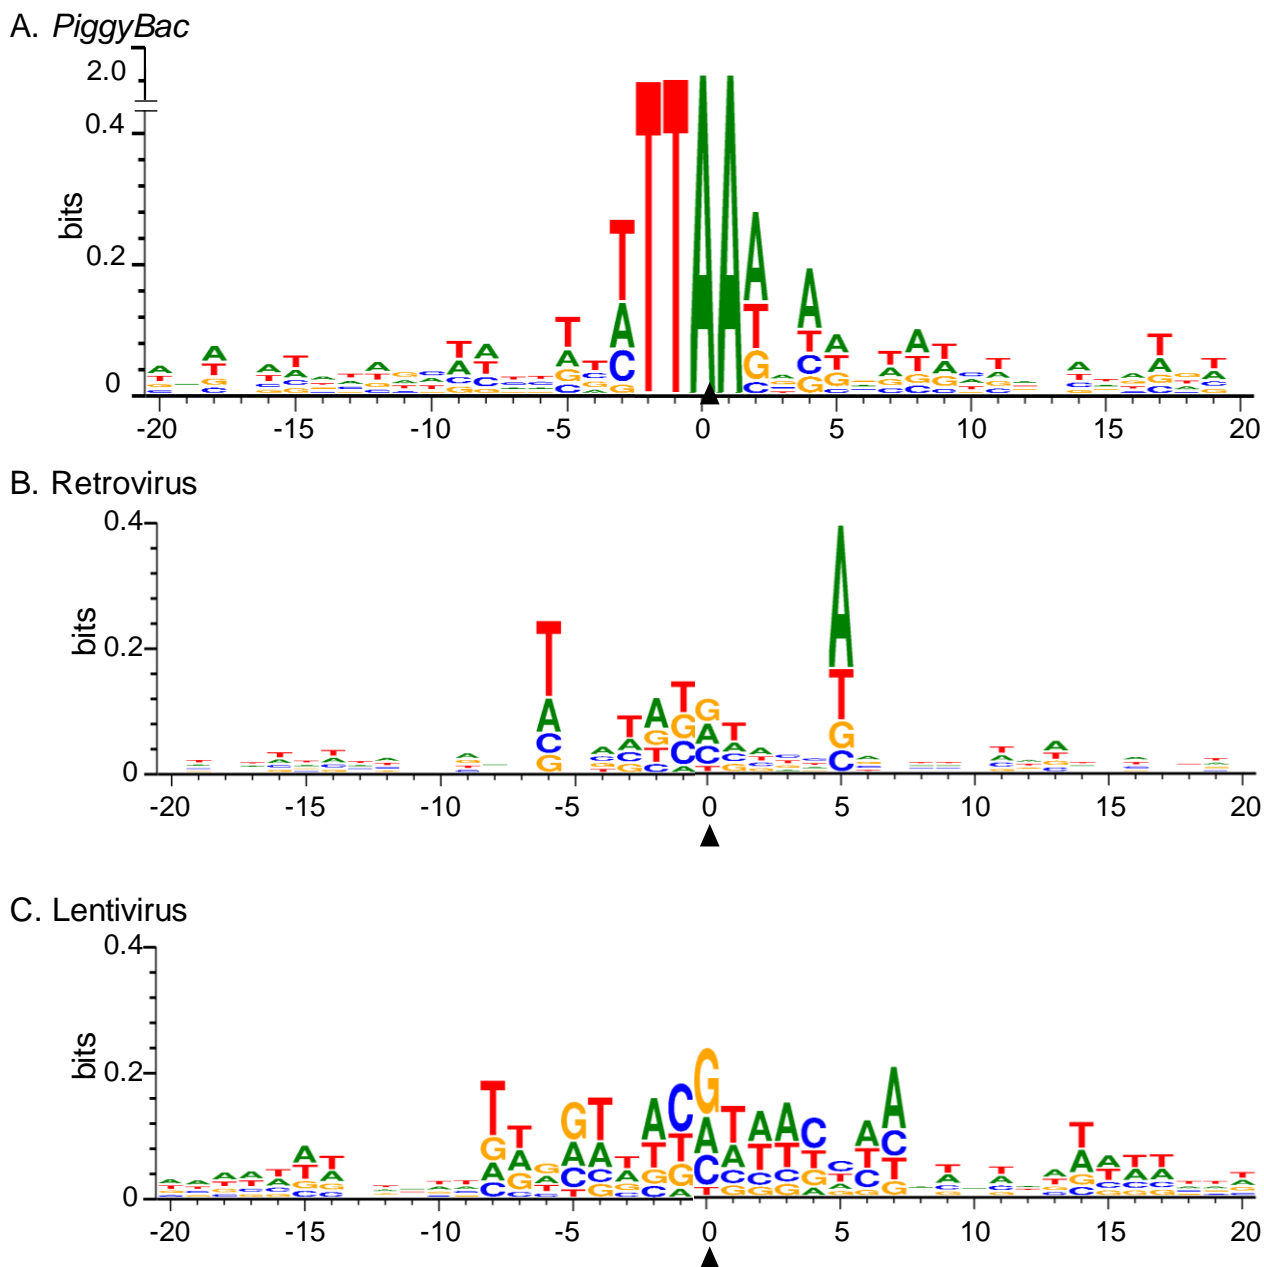

**Supplementary Fig. 3. Local sequences near vector integration sites**

The WebLogo diagrams indicate consensus sequences near integration sites of CD19 CAR T cells generated by *piggyBac* transposon (A), retrovirus (B), and lentivirus (C). The X-axis denotes the distance from vector integration sites and arrowheads indicate vector integration sites. The overall height of each stack indicates the sequence conservation at each position (measured in bits), and the height of the letters within the stack reflects the relative frequency of the corresponding nucleic acids.

**Supplementary Table 1. List of sequences of primers**

| Round               | Primer name         | Sequence (5'-3')                                           |
|---------------------|---------------------|------------------------------------------------------------|
| 1 <sup>st</sup> PCR | NTSR1-F1            | TCGTCGGCAGCGTCAGAT                                         |
|                     | NTSR2-F1            | GTCTCGTGGGCTCGGAGATG                                       |
|                     | PB-NTSR1-R1         | GTCTCGTGGGCTCGGAGATGTGTATAAGAGACAGACGCAGACTATCTTTCTAGGGTT  |
|                     | PB-NTSR1-R2         | GTCTCGTGGGCTCGGAGATGTGTATAAGAGACAGTTCAAGAATGCATGCGTCAATTT  |
|                     | PB-NTSR1-RCR1       | GTCTCGTGGGCTCGGAGATGTGTATAAGAGACAGGACCGATAAAAACACATGCGTCA  |
|                     | PB-NTSR2-R1         | TCGTCGGCAGCGTCAGATGTGTATAAGAGACAGTTACGCAGACTATCTTTCTAGGGTT |
|                     | PB-NTSR2-R2         | TCGTCGGCAGCGTCAGATGTGTATAAGAGACAGGCGACGGATTTCGCGCTATTT     |
|                     | PB-NTSR2-RCR1       | TCGTCGGCAGCGTCAGATGTGTATAAGAGACAGGACCGATAAAAACACATGCGTCA   |
|                     | RV-NTSR1-R1         | GTCTCGTGGGCTCGGAGATGTGTATAAGAGACAGATGCCTTGCAAATGGCGTTA     |
|                     | RV-NTSR1-RCR1       | GTCTCGTGGGCTCGGAGATGTGTATAAGAGACAGTCCAATAAACCTCTTGCAGTTG   |
|                     | RV-NTSR1-RCR2       | GTCTCGTGGGCTCGGAGATGTGTATAAGAGACAGGTCTCGCTGTTCCCTGGGAG     |
|                     | RV-NTSR2-R1         | TCGTCGGCAGCGTCAGATGTGTATAAGAGACAGATGCCTTGCAAATGGCGTTA      |
|                     | RV-NTSR2-RCR1       | TCGTCGGCAGCGTCAGATGTGTATAAGAGACAGTCCAATAAACCTCTTGCAGTTG    |
|                     | RV-NTSR2-RCR2       | TCGTCGGCAGCGTCAGATGTGTATAAGAGACAGGTCTCGCTGTTCCCTGGGAG      |
|                     | LV-NTSR1-R1         | GTCTCGTGGGCTCGGAGATGTGTATAAGAGACAGAAGCAGTGGGTTCCCTAGTT     |
|                     | LV-NTSR1-RCR1       | GTCTCGTGGGCTCGGAGATGTGTATAAGAGACAGTAGTGTGTGCCCGTCTGTTG     |
|                     | LV-NTSR1-RCR2       | GTCTCGTGGGCTCGGAGATGTGTATAAGAGACAGAACTAGAGATCCCTCAGACCCT   |
|                     | LV-NTSR2-R1         | TCGTCGGCAGCGTCAGATGTGTATAAGAGACAGAAGCAGTGGGTTCCCTAGTT      |
|                     | LV-NTSR2-RCR1       | TCGTCGGCAGCGTCAGATGTGTATAAGAGACAGTAGTGTGTGCCCGTCTGTTG      |
|                     | LV-NTSR2-RCR2       | TCGTCGGCAGCGTCAGATGTGTATAAGAGACAGAACTAGAGATCCCTCAGACCCT    |
| 2 <sup>nd</sup> PCR | Nextera-2nd-i5-N501 | AATGATACGGCGACCACCGAGATCTACACTAGATCGCTCGTCGGCAGCGTC        |
|                     | Nextera-2nd-i7-N716 | CAAGCAGAAGACGGCATAACGAGATTAGCGAGTGTCTCGTGGGCTCGG           |
|                     | Nextera-2nd-i7-N718 | CAAGCAGAAGACGGCATAACGAGATGTAGCTCCGTCTCGTGGGCTCGG           |
|                     | Nextera-2nd-i7-N719 | CAAGCAGAAGACGGCATAACGAGATTACTACGCGTCTCGTGGGCTCGG           |
|                     | Nextera-2nd-i7-N720 | CAAGCAGAAGACGGCATAACGAGATAGGCTCCGTCTCGTGGGCTCGG            |
|                     | Nextera-2nd-i7-N721 | CAAGCAGAAGACGGCATAACGAGATGCAGCGTAGTCTCGTGGGCTCGG           |
|                     | Nextera-2nd-i7-N722 | CAAGCAGAAGACGGCATAACGAGATCTGCGCATGTCTCGTGGGCTCGG           |
|                     | Nextera-2nd-i7-N723 | CAAGCAGAAGACGGCATAACGAGATGAGCGCTAGTCTCGTGGGCTCGG           |
|                     | Nextera-2nd-i7-N724 | CAAGCAGAAGACGGCATAACGAGATCGCTCAGTGTCTCGTGGGCTCGG           |
|                     | Nextera-2nd-i7-N726 | CAAGCAGAAGACGGCATAACGAGATGTCTTAGGGTCTCGTGGGCTCGG           |

\*Blue and purple letters indicate incomplete adapter sequences for P5 and P7 adapters, respectively. Green letters indicate sequences for completing adapters.

**Supplementary Table 2. Pairing of primers for 1<sup>st</sup> PCR**

| Vector          | Forward primer | Reverse primer |
|-----------------|----------------|----------------|
| <i>PiggyBac</i> | NTSR1-F1       | PB-NTSR1-R1    |
|                 |                | PB-NTSR1-R2    |
|                 |                | PB-NTSR1-RCR1  |
|                 | NTSR2-F1       | PB-NTSR2-R1    |
|                 |                | PB-NTSR2-R2    |
|                 |                | PB-NTSR2-RCR1  |
| Retrovirus      | NTSR1-F1       | RV-NTSR1-R1    |
|                 |                | RV-NTSR1-RCR1  |
|                 |                | RV-NTSR1-RCR2  |
|                 | NTSR2-F1       | RV-NTSR2-R1    |
|                 |                | RV-NTSR2-RCR1  |
|                 |                | RV-NTSR2-RCR2  |
| Lentivirus      | NTSR1-F1       | LV-NTSR1-R1    |
|                 |                | LV-NTSR1-RCR1  |
|                 |                | LV-NTSR1-RCR2  |
|                 | NTSR2-F1       | LV-NTSR2-R1    |
|                 |                | LV-NTSR2-RCR1  |
|                 |                | LV-NTSR2-RCR2  |

**Supplementary Table 4. List of oncogenes with integrations into or within 50kb from TSSs**

| <i>PiggyBac</i> | Retrovirus      | Lentivirus      |
|-----------------|-----------------|-----------------|
| <i>ATM</i>      | <i>ACKR3</i>    | <i>ABI1</i>     |
| <i>ATRX</i>     | <i>ARHGAP26</i> | <i>AKAP9</i>    |
| <i>BTG1</i>     | <i>ARID1A</i>   | <i>ARHGAP26</i> |
| <i>CALR</i>     | <i>BCL11B</i>   | <i>ARID1A</i>   |
| <i>CBL</i>      | <i>BRD4</i>     | <i>ARNT</i>     |
| <i>CBLB</i>     | <i>CARD11</i>   | <i>ASXL1</i>    |
| <i>CNBP</i>     | <i>CCND3</i>    | <i>ATM</i>      |
| <i>DDX6</i>     | <i>CD274</i>    | <i>BCL2</i>     |
| <i>ELF4</i>     | <i>CDK6</i>     | <i>BRAF</i>     |
| <i>EXT2</i>     | <i>EWSR1</i>    | <i>BRCA1</i>    |
| <i>FBXO11</i>   | <i>FGFR1OP</i>  | <i>BRD4</i>     |
| <i>FNBP1</i>    | <i>GOLGA5</i>   | <i>BRIP1</i>    |
| <i>FOXP1</i>    | <i>HLA-A</i>    | <i>CASP8</i>    |
| <i>ITK</i>      | <i>IKZF1</i>    | <i>CBL</i>      |
| <i>LPP</i>      | <i>IL7R</i>     | <i>CCND3</i>    |
| <i>MDS2</i>     | <i>KAT6A</i>    | <i>CCNE1</i>    |
| <i>MLLT6</i>    | <i>KAT6B</i>    | <i>CD274</i>    |
| <i>MYB</i>      | <i>KDM6A</i>    | <i>CNTRL</i>    |
| <i>NCOA2</i>    | <i>LCK</i>      | <i>COL2A1</i>   |
| <i>NF2</i>      | <i>MALAT1</i>   | <i>CRTC3</i>    |
| <i>NIN</i>      | <i>MYH9</i>     | <i>CYLD</i>     |
| <i>NTRK1</i>    | <i>NCOA2</i>    | <i>DDX6</i>     |
| <i>PML</i>      | <i>NF1</i>      | <i>ERCC3</i>    |
| <i>PMS1</i>     | <i>NFATC2</i>   | <i>FANCA</i>    |
| <i>PPARG</i>    | <i>PRF1</i>     | <i>FBXW7</i>    |
| <i>PTPRC</i>    | <i>PTPRC</i>    | <i>FOXP1</i>    |
| <i>RAD51B</i>   | <i>PTPRK</i>    | <i>GOLGA5</i>   |
| <i>RPL22</i>    | <i>RARA</i>     | <i>IL7R</i>     |
| <i>RUNX1</i>    | <i>RNF213</i>   | <i>IRF4</i>     |
|                 | <i>RUNX1</i>    | <i>JAK3</i>     |
|                 | <i>SUFU</i>     | <i>KDM6A</i>    |
|                 | <i>TNFAIP3</i>  | <i>KIF5B</i>    |
|                 | <i>TPM4</i>     | <i>KTN1</i>     |
|                 | <i>UBR5</i>     | <i>LCK</i>      |
|                 | <i>WHSC1L1</i>  | <i>LPP</i>      |
|                 |                 | <i>LSM14A</i>   |

|  |                 |
|--|-----------------|
|  | <i>NCOA4</i>    |
|  | <i>NCOR1</i>    |
|  | <i>NSD1</i>     |
|  | <i>NUP214</i>   |
|  | <i>PBRM1</i>    |
|  | <i>PCM1</i>     |
|  | <i>PHF6</i>     |
|  | <i>PLAG1</i>    |
|  | <i>PWWP2A</i>   |
|  | <i>RABEP1</i>   |
|  | <i>RAC1</i>     |
|  | <i>RAP1GDS1</i> |
|  | <i>RHOH</i>     |
|  | <i>RNF213</i>   |
|  | <i>RUNX1</i>    |
|  | <i>SETD2</i>    |
|  | <i>SH3GL1</i>   |
|  | <i>SMAD4</i>    |
|  | <i>SS18</i>     |
|  | <i>STAT3</i>    |
|  | <i>STAT5B</i>   |
|  | <i>TBL1XR1</i>  |
|  | <i>TCF3</i>     |
|  | <i>TFRC</i>     |
|  | <i>TOP1</i>     |
|  | <i>TSC2</i>     |
|  | <i>U2AF1</i>    |
|  | <i>WHSC1</i>    |
|  | <i>WHSC1L1</i>  |
|  | <i>ZNF331</i>   |
